# Supplementary material for: Classification of Colon Cancer Patients Based on the Methylation Patterns of Promoters
Source: PubMed Central journal article supplement — Genomics Inform. 2016 Jun 30;14(2):46–52. doi: 10.5808/GI.2016.14.2.46 (PMC4951400; doi:10.5808/gi.2016.14.2.46), 2016-06-30
Supplement: gni-14-46-s001.pdf [file gni-14-46-s001.pdf]

## SUPPLEMENTARY INFORMATION

### Classification of Colon Cancer Patients Based on the Methylation Patterns of Promoters

Wonyoung Choi<sup>1†</sup>, Jungwoo Lee<sup>1†</sup>, Jin-Young Lee<sup>2</sup>, Sun-Min Lee<sup>2</sup>,  
Da-Won Kim<sup>1</sup>, Young-Joon Kim<sup>1,2\*</sup>

<sup>1</sup>Department of Integrated OMICS for Biomedical Science, Graduate School,  
Yonsei University, Seoul 03722, Korea

<sup>2</sup>Department of Biochemistry, College of Life Science & Biotechnology,  
Yonsei University, Seoul 03722, Korea

**Supplementary Table 1.** Clinical data of three patients groups in colon cancer

|                                         |                           | Group 1 (n = 110) | Group 2 (n = 76) | Group 3 (n = 109) |
|-----------------------------------------|---------------------------|-------------------|------------------|-------------------|
| Race                                    | Asian                     | 4                 | 5                | 2                 |
|                                         | Black or African American | 32                | 10               | 14                |
|                                         | White                     | 57                | 80               | 75                |
| Age (yr)                                | ≥ 60                      | 73                | 80               | 50                |
|                                         | < 60                      | 27                | 18               | 50                |
| Gender                                  | Male                      | 50                | 56               | 55                |
|                                         | Female                    | 50                | 43               | 45                |
| Tumor stage                             | I                         | 16                | 24               | 7                 |
|                                         | II                        | 35                | 46               | 39                |
|                                         | III                       | 32                | 25               | 30                |
|                                         | IV                        | 18                | 4                | 18                |
| Tumor size                              | T1                        | 2                 | 3                | 3                 |
|                                         | T2                        | 15                | 24               | 7                 |
|                                         | T3                        | 64                | 66               | 77                |
|                                         | T4                        | 18                | 7                | 13                |
| Microsatellite instability              | Yes                       | 0.9               | 12               | 0.9               |
|                                         | No                        | 23                | 24               | 32                |
| Metastasis                              | Yes                       | 16                | 4                | 18                |
|                                         | No                        | 65                | 74               | 63                |
| Vital status                            | Alive                     | 85                | 84               | 86                |
|                                         | dead                      | 14                | 15               | 14                |
| Residual tumor                          | R0                        | 71                | 55               | 69                |
|                                         | R1                        | 2                 | 1                | 0                 |
|                                         | R2                        | 2                 | 0                | 3                 |
| New tumor event after initial treatment | Yes                       | 5                 | 0                | 4                 |
|                                         | No                        | 17                | 7                | 6                 |
| Anatomic neoplasm subdivision           | Ascending colon           | 16                | 29               | 14                |

|                  |    |    |    |
|------------------|----|----|----|
| Cecum            | 29 | 42 | 11 |
| Descending colon | 5  | 3  | 6  |
| Hepatic flexure  | 7  | 8  | 4  |
| Sigmoid colon    | 32 | 4  | 46 |
| Transverse colon | 7  | 7  | 13 |

---
