# Supplementary material for: Classification of Colon Cancer Patients Based on the Methylation Patterns of Promoters
Source: PubMed Central journal article supplement — Genomics Inform. 2016 Jun 30;14(2):46–52. doi: 10.5808/GI.2016.14.2.46 (PMC4951400; doi:10.5808/gi.2016.14.2.46), 2016-06-30
Supplement: gni-14-46-s002.pdf [file gni-14-46-s002.pdf]

## SUPPLEMENTARY INFORMATION

### Classification of Colon Cancer Patients Based on the Methylation Patterns of Promoters

Wonyoung Choi<sup>1†</sup>, Jungwoo Lee<sup>1†</sup>, Jin-Young Lee<sup>2</sup>, Sun-Min Lee<sup>2</sup>,  
Da-Won Kim<sup>1</sup>, Young-Joon Kim<sup>1,2\*</sup>

<sup>1</sup>Department of Integrated OMICS for Biomedical Science, Graduate School,  
Yonsei University, Seoul 03722, Korea

<sup>2</sup>Department of Biochemistry, College of Life Science & Biotechnology,  
Yonsei University, Seoul 03722, Korea

**Supplementary Table 2.** Pathway analysis result from hypermethylated promoter CGI genes

| General pathway           | Pathway name                                                   | p-value                                         |          |
|---------------------------|----------------------------------------------------------------|-------------------------------------------------|----------|
| GPCR                      | GPCR signaling                                                 | 5.79.E-06                                       |          |
|                           | GPCR ligand binding                                            | 1.58.E-02                                       |          |
|                           | G alpha (s) signalling events                                  | 1.10.E-02                                       |          |
| Migration, invasion ECM   | ECM organization                                               | 5.32E-07                                        |          |
|                           | Collagen biosynthesis and modifying enzymes                    | 3.57E-04                                        |          |
|                           | Collagen formation                                             | 1.71E-03                                        |          |
|                           | Degradation of the extracellular matrix                        | 1.74E-03                                        |          |
|                           | Elastic fiber formation                                        | 1.56E-02                                        |          |
|                           | Molecules associated with elastic fibers                       | 1.90E-02                                        |          |
|                           | ECM proteoglycans                                              | 3.03E-02                                        |          |
|                           | Assembly of collagen fibrils and other multimeric structures   | 3.03E-02                                        |          |
|                           | Heparan sulfate/heparin (HS-GAG) metabolism                    | 3.03E-02                                        |          |
|                           | Cell adhesion                                                  | CAMs                                            | 2.02E-04 |
|                           |                                                                | NCAM1 interactions                              | 5.27E-04 |
|                           |                                                                | NCAM signaling for neurite out-growth           | 1.12E-02 |
|                           |                                                                | Integrin cell surface interactions              | 2.69E-02 |
|                           |                                                                | Integrin signaling pathway                      | 3.95E-02 |
|                           |                                                                | Gap junction                                    | 3.98E-02 |
|                           |                                                                | Chondroitin sulfate/dermatan sulfate metabolism | 2.28E-02 |
|                           |                                                                | Sialic acid metabolism                          | 2.68E-02 |
|                           |                                                                | Chondroitin sulfate biosynthesis                | 3.75E-02 |
|                           |                                                                | Beta1 integrin cell surface interactions        | 2.40E-02 |
| etc                       | Netrin-1 signaling                                             | 8.45E-03                                        |          |
| Ion channel               | Ion channels and their functional role in vascular endothelium | 8.45.E-03                                       |          |
|                           | Potassium channels                                             | 2.06.E-02                                       |          |
|                           | Ion channel transport                                          | 3.04.E-02                                       |          |
|                           | Voltage gated potassium channels                               | 3.17.E-02                                       |          |
| Calcium signaling pathway | Calcium signaling pathway                                      | 3.52.E-04                                       |          |
| Glutamate receptor        | Activation of NMDA receptor upon glutamate                     | 2.42.E-02                                       |          |

|                               |                                                                          |           |
|-------------------------------|--------------------------------------------------------------------------|-----------|
|                               | binding and postsynaptic events                                          |           |
|                               | Unblocking of NMDA receptor, glutamate binding and activation            | 2.63.E-02 |
|                               | Activation of AMPA receptors                                             | 1.53.E-02 |
|                               | Trafficking of GluR2-containing AMPA receptors                           | 3.04.E-02 |
| Angiogenesis                  | O-glycosylation of TSR domain-containing proteins                        | 1.11.E-03 |
| RAS family                    | Regulation of RAC1 activity                                              | 4.98.E-03 |
| Wnt signaling                 | Negative regulation of TCF-dependent signaling by Wnt ligand antagonists | 1.98.E-02 |
| Generic transcription pathway | Generic transcription pathway                                            | 1.18.E-04 |
| Developmental biology         | Developmental biology                                                    | 2.76.E-04 |
| Melanoma                      | Melanoma                                                                 | 2.71.E-02 |

CGI, CpG island; GPCR, G protein coupled receptor; ECM, extracellular matrix; CAMs, cell adhesion molecules; NCAM, neural cell adhesion molecule; NMDA, N-methyl-D-aspartate; AMPA,  $\alpha$ -amino-3-hydroxy-5-methyl-4-isoxazolepropionic acid; TSR, thrombospondin type 1 repeat; TCF, T-cell factor.
